# Supplementary material
Source: PubMed Central journal article supplement (PMC6796984)
Supplement: ao9b01550_si_001.pdf [file ao9b01550_si_001.pdf]

# Supporting information

## Membrane-protected molecularly imprinted polymer for the microextraction of indole-3-butyric acid in mung bean sprouts

Sailemayi Aihebaier<sup>1</sup>, Turghun Muhammad<sup>1\*</sup>, Aixia Wei<sup>1</sup>, Anwar Mamat<sup>1</sup>, Munira Abuduaini<sup>2</sup>, Parezhati Pataer<sup>1</sup>, Aziguli Yigaimu<sup>1</sup>, and Abliz Yimit<sup>1</sup>

1 College of Chemistry & Chemical Engineering, Xinjiang University, Key Laboratory of Oil and Gas Fine Chemical, Educational Ministry of China, Urumqi 830046, China

2 The Key Laboratory of Plant Resources and Chemistry of Arid Zone, Xinjiang Technical Institute of Physics and Chemistry, Chinese Academy of Sciences, Urumqi 830011, China

E-mail: turghunm@sina.com

### \*Corresponding Author:

E-mail: turghunm@sina.com. Phone: +86 9918582564. Fax: +86 9918582809

**Table S1.** Retention capacity and separation factor of IBA and its analogous on MIP and NIP

**Table S2.** The results of Orthogonal experiment L<sup>9</sup>(3<sup>4</sup>)

**Figure S1.** HPLC Chromatograms of IBA standard solutions  $\lambda=281\text{nm}$ ; The concentration: range were (1, 2.5, 5, 10, 20, 50 mg/L); insert: calibration curve:  $R^2=0.9999$ ,  $y=836.5356x-5.8531$

**Figure S2.** HPLC Chromatograms of real samples were spiked within the range of 5~20 mg/L

### Highlights:

- 1) Simultaneously extraction of combined with SPME and  $\mu\text{SPE}$
- 2) General process of bulk polymerization
- 3) A novel process for plant auxins
- 4) The  $\mu\text{SPE}$  of low consumption, simplicity, rapidity, sample purification

Table S1. Retention factors(k), imprinting factors (IF) and selectivity factors ( $\alpha$ ) of IBA and its analogous on MIP and NIP

| Analogous | $k_{MIP}$ | $k_{NIP}$ | IF   | $\alpha$ |
|-----------|-----------|-----------|------|----------|
| IBA       | 17.5      | 11.6      | 1.51 | 1.0      |
| IPA       | 13.5      | 10.0      | 1.35 | 1.3      |
| IAA       | 13.2      | 11.1      | 1.19 | 1.3      |
| TA        | 0.5       | 0.6       | 0.83 | 35       |

IF=  $k_{MIP}/k_{NIP}$

**Table S2.** The results of Orthogonal experiment  $L^9(3^4)$

| Trail      | Column         |                |                |                | $C/d_{desorption}(mg/L)$ |
|------------|----------------|----------------|----------------|----------------|--------------------------|
|            | A              | B              | C              | D              |                          |
| 1)         | 1*             | 1              | 1              | 1              | 0.49                     |
| 2)         | 1              | 2#             | 2              | 2              | 1.49                     |
| 3)         | 1              | 3*             | 3              | 3              | 0.15                     |
| 4)         | 2              | 1              | 2              | 3              | 2.76                     |
| 5)         | 2              | 2              | 3              | 1              | 0.50                     |
| 6)         | 2              | 3              | 1              | 2              | 2.63                     |
| 7)         | 3              | 1              | 3              | 2              | 0.27                     |
| 8)         | 3              | 2              | 1              | 2              | 3.66                     |
| 9)         | 3              | 3              | 2              | 1              | 3.28                     |
| K1         | 4.26           | 7.04           | 13.55          | 8.53           |                          |
| K2         | 11.77          | 11.03          | 15.05          | 8.77           |                          |
| K3         | 14.41          | 12.1           | 1.84           | 13.14          |                          |
| k1         | 1.42           | 2.35           | 4.52           | 2.84           |                          |
| k2         | 3.92           | 3.77           | 5.02           | 2.92           |                          |
| k3         | 4.80           | 4.03           | 0.61           | 4.38           |                          |
| R          | 10.15          | 5.00           | 1.50           | 4.61           |                          |
| Best level | A <sub>3</sub> | B <sub>3</sub> | C <sub>2</sub> | D <sub>3</sub> |                          |

\*The extraction time was 40 min, rotate speed was 600 rpm, pH was 2.0, salt effect was 0%, #the extraction time was 60 min, rotate speed was 800 rpm, pH was 4.0, salt effect was 5%, \*the extraction time was 80 min, rotate speed was 1000 rpm, pH was 6.0, salt effect was 10%

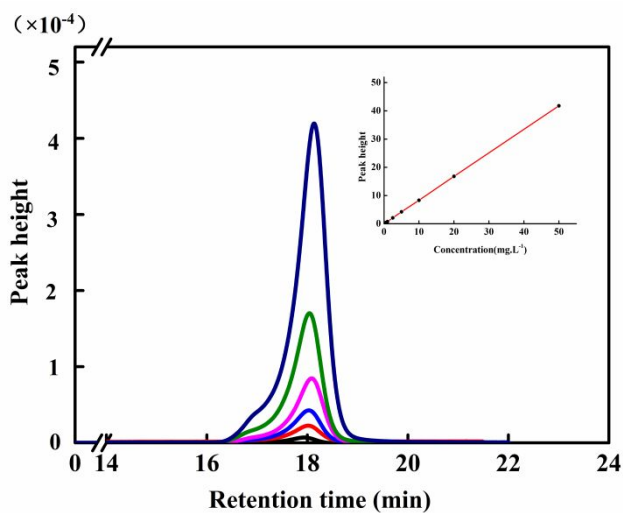

**Figure S1.** HPLC Chromatograms of IBA standard solutions  $\lambda=281\text{nm}$ ; The concentration: range were (1, 2.5, 5, 10, 20, 50 mg/L); insert: calibration curve:  $R^2=0.9999$ ,  $y=836.5356x-5.8531$

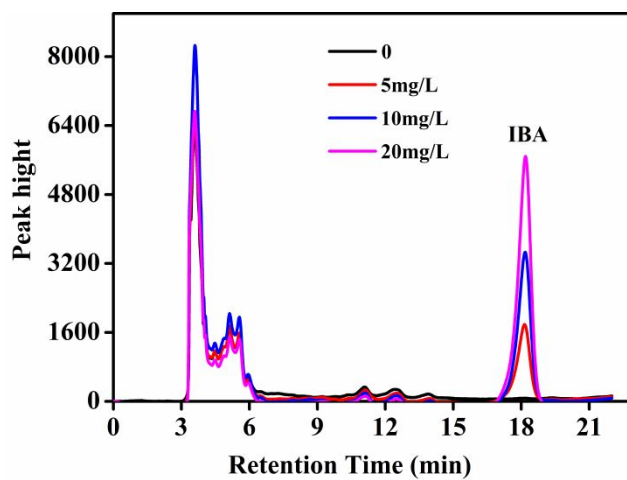

**Figure S2.** HPLC Chromatograms of real samples were spiked with 5, 10, 20 mg/L IBA
